# Supplementary material
Source: PubMed Central journal article supplement (PMC3350365)
Supplement: supp_blood-2011-10-385377_blood-2011-10-385377-1.pdf [file supp_blood-2011-10-385377_blood-2011-10-385377-1.pdf]

**Table S1****A: Blood lymphocyte subsets**

|                                                    | ( $\times 10^9/L$ ) | Normal ( $\times 10^9/L$ ) |
|----------------------------------------------------|---------------------|----------------------------|
| Total lymphocytes                                  | 1.1-3.2             | (1.5-4.8)                  |
| CD3+                                               | 1.21 $\pm$ 0.06     | (1.1-2.2)                  |
| CD3/4+                                             | 0.87 $\pm$ 0.05     | (0.8-1.7)                  |
| CD3/8+                                             | 0.29 $\pm$ 0.01     | (0.3-0.9)                  |
| CD19                                               | 0.09 $\pm$ 0.03     | (0.1-0.6)                  |
| CD3 <sup>-</sup> /16 <sup>+</sup> /56 <sup>+</sup> | 0.006 $\pm$ 0.002   | (0.10-0.48)                |

**B: Lymphocyte proliferative responses (Stimulation Indices [SI])**

| Mitogens (Day 3)   | SI  | Normal | Antigens (Day 7)        | SI   | Normal |
|--------------------|-----|--------|-------------------------|------|--------|
| Phytohemagglutinin | 215 | (>40)  | Tetanus toxoid          | 6.8  | (>3)   |
| Concanavalin A     | 51  | (>20)  | Diphtheria toxoid       | 3.1  | (>3)   |
| Pokeweed mitogen   | 67  | (>11)  | <i>Candida albicans</i> | 11.8 | (>3)   |
| Anti-CD3 mAb       | 154 | (>30)  | Varicella               | 6.0  | (>3)   |

Unstimulated: 400 cpm <sup>3</sup>H-thymidine at Day 3 and 1925 cpm at Day 7

**C: Cytotoxic T cell and NK cell function**

| Cytotoxic T Cell Function |                 |              | Natural Killer Cell Function |                 |              |
|---------------------------|-----------------|--------------|------------------------------|-----------------|--------------|
| E:T*                      | % Cytotoxicity† | Normal       | E:T*                         | % Cytotoxicity‡ | Normal       |
| 50:1                      | 37              | ( $\geq$ 35) | 50:1                         | 2 (Low)         | ( $\geq$ 20) |
| 25:1                      | 28              | ( $\geq$ 25) | 25:1                         | 2 (Low)         | ( $\geq$ 10) |
| 12:1                      | 16              | ( $\geq$ 15) | 12:1                         | 1 (Low)         | ( $\geq$ 5)  |
| 6:1                       | 10              | ( $\geq$ 10) | 6:1                          | 1               | ( $\geq$ 1)  |
| CTL Lytic Units           | 12              | ( $\geq$ 6)  | NK Lytic Units               | 0 (Low)         | (6-27)       |

\* E:T – Effector to target cell ratio.

† Target cells: Allogeneic EBV-B cells.

‡ Target cells: K562 erythroleukemia cells.

**Table S2****A: Immunoglobulins and specific antibodies**

| Serum Immunoglobulins               | Value      | Normal Values  |
|-------------------------------------|------------|----------------|
| IgG                                 | 13.2 g/L   | (8.0-15.0 g/L) |
| IgA                                 | 4.74 g/L   | (0.9-3.2 g/L)  |
| IgM                                 | 1.13 g/L   | (0.45-1.5 g/L) |
| Tetanus toxoid IgG                  | 12.5 IU/mL | (>0.1 IU/mL)   |
| Diphtheria toxoid IgG               | 0.97 IU/mL | (>0.1 IU/mL)   |
| <i>S. pneumoniae</i> polysacch. IgG | 1:530      | (>1:128)       |
| Varicella IgG                       | Immune     | Immune         |
| Measles IgG                         | Immune     | Immune         |

**B: Serology screen**

|                      |   |
|----------------------|---|
| EBV-VCA (IgG)        | + |
| EBV-VCA (IgM)        | - |
| Heterophile Antibody | - |
| CMV (IgG/IgM)        | - |
| HIV 1/2              | - |
